# Supplementary material for: 3D-Printed Ceramic Bone Scaffolds with Variable Pore Architectures
Source: MDPI journal article supplement (doi:10.3390/ijms21186942), 2020-09-22
Supplement: s1 [file s1]

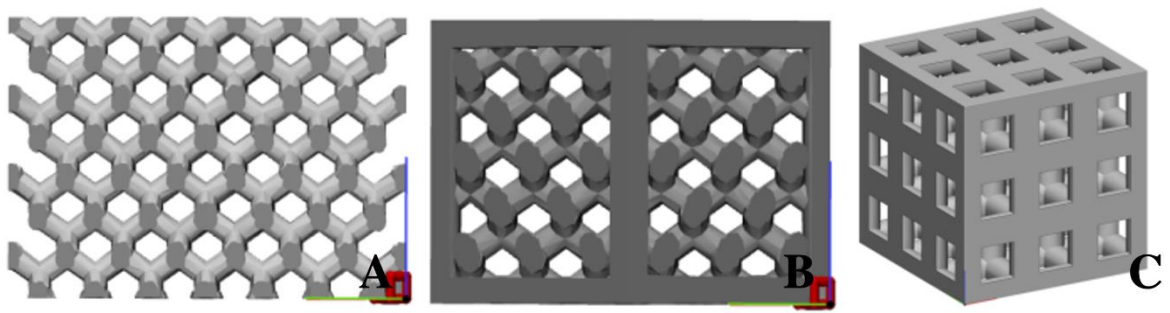

**Figure S1.** Specimen designs for compression test.
